# Supplementary material for: Functionalization of a porous copper( ii ) metal–organic framework and its capacity for loading and delivery of ibuprofen
Source: Royal Society of Chemistry journal article supplement (doi:10.1039/d4ra03678f), 2024-01-01
Supplement: d4ra03678f1.pdf [file d4ra03678f1.pdf]

## Functionalization of 3D porous copper(II) Metal-organic framework and its capacity for loading and delivery of Ibuprofen drug

Adedibu C. Tella<sup>a\*</sup>; Sunday J. Olatunji<sup>a,b</sup>, Peter A. Ajibade<sup>b</sup>;

<sup>a</sup> Department of Chemistry, P.M.B.1515, University of Ilorin, Ilorin, Kwara State, Nigeria

<sup>b</sup> School of Chemistry and Physics, University of KwaZulu-Natal, Private Bag X01, Scottsville 3209, South Africa

### Supplementary Information

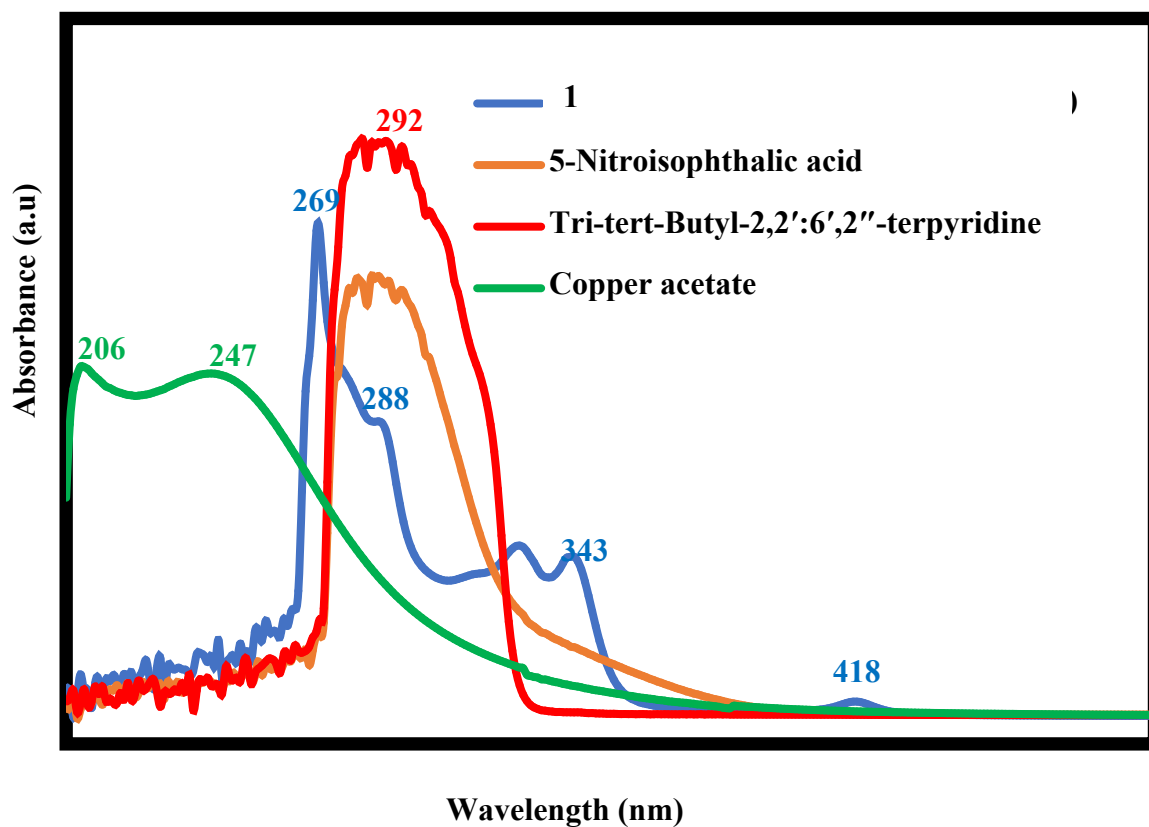

Figure S1: Electronic Spectra of 4,4',4''-Tri-tert-Butyl-2,2':6',2''-terpyridine, 5-Nitroisophthalic acid,  $\text{Cu}(\text{CH}_3\text{COO})_2 \cdot \text{H}_2\text{O}$  and **1**.

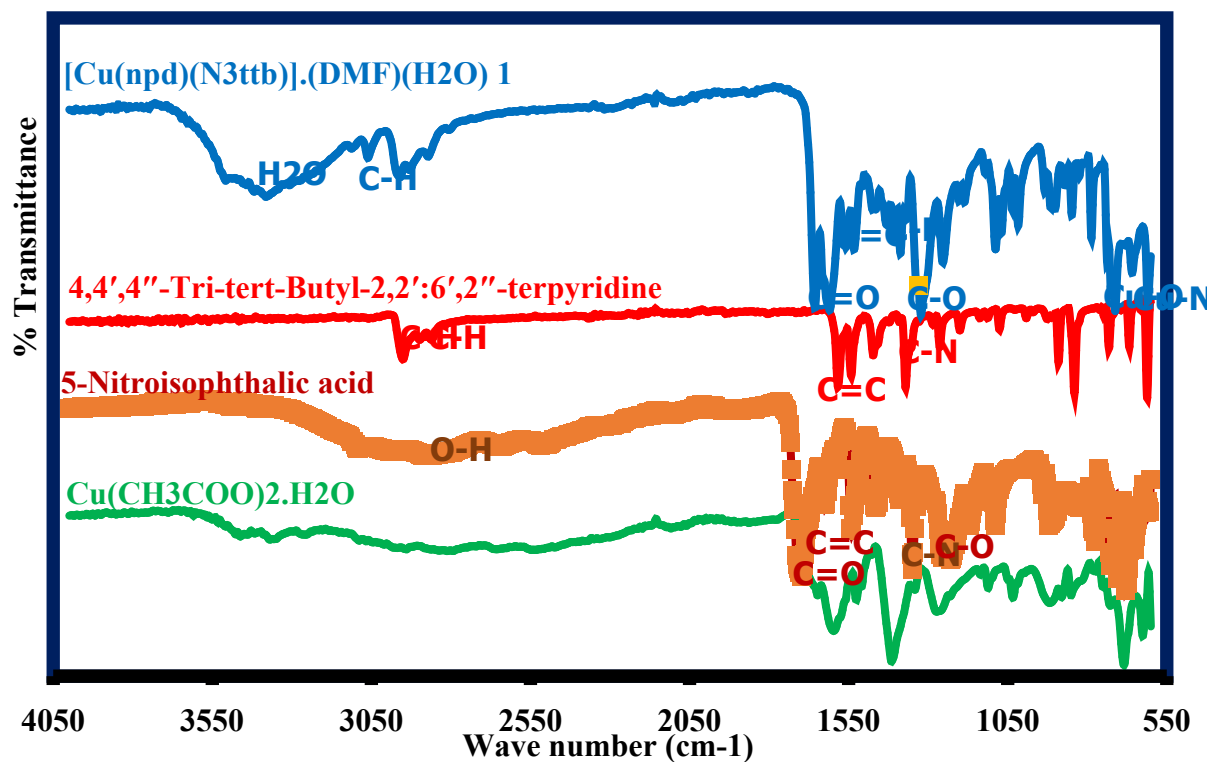

Figure S2: FT-IR spectra of 4,4',4''-Tri-tert-Butyl-2,2':6',2''-terpyridine, 5-Nitroisophthalic acid, Cu(CH<sub>3</sub>COO)<sub>2</sub>.H<sub>2</sub>O and 1.

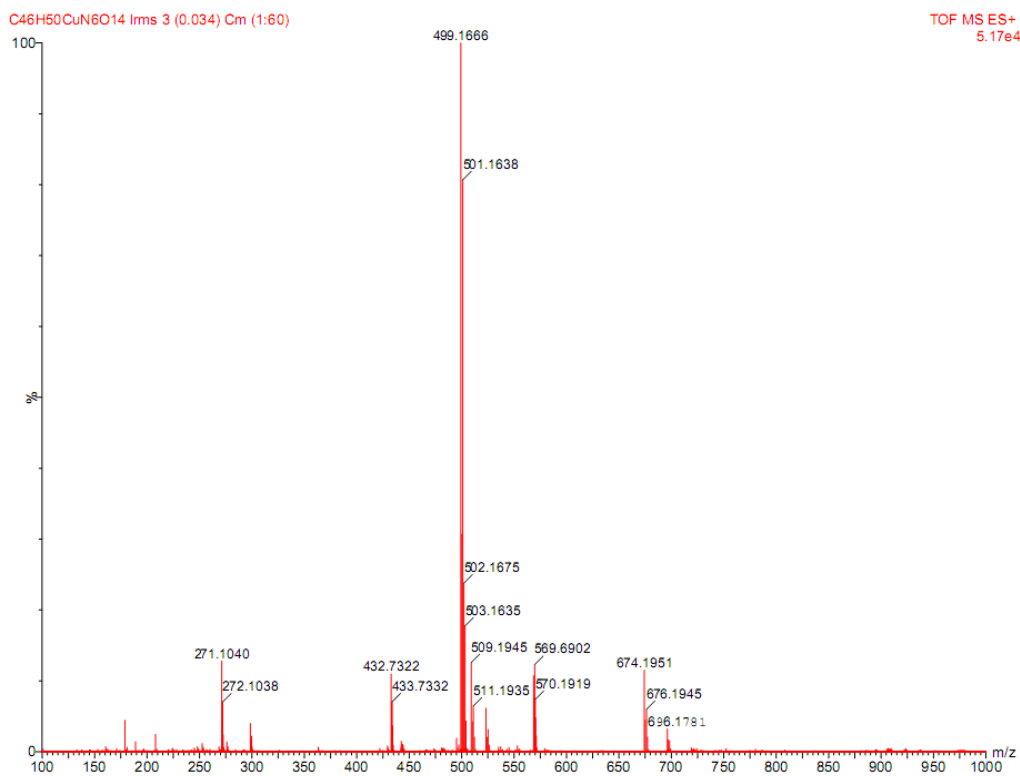

Figure S3: Mass spectra of 1.

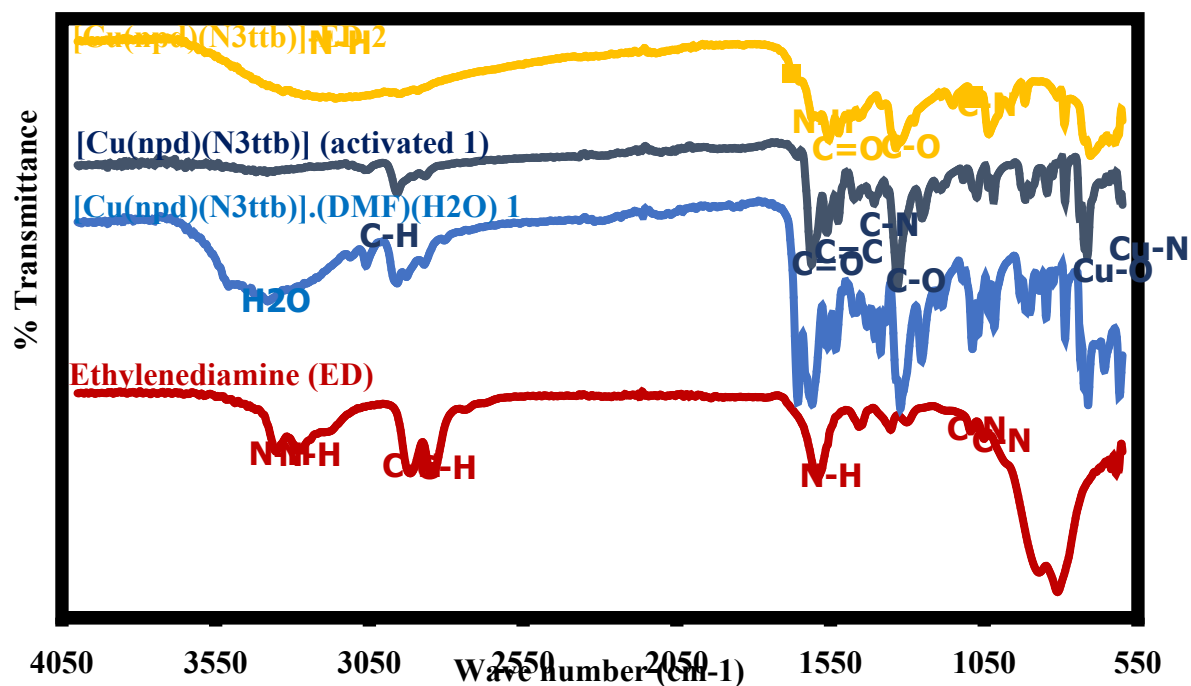

Figure S4: Comparison of the FT-IR spectra of ethylenediamine, as-synthesized, activated, and functionalized MOFs

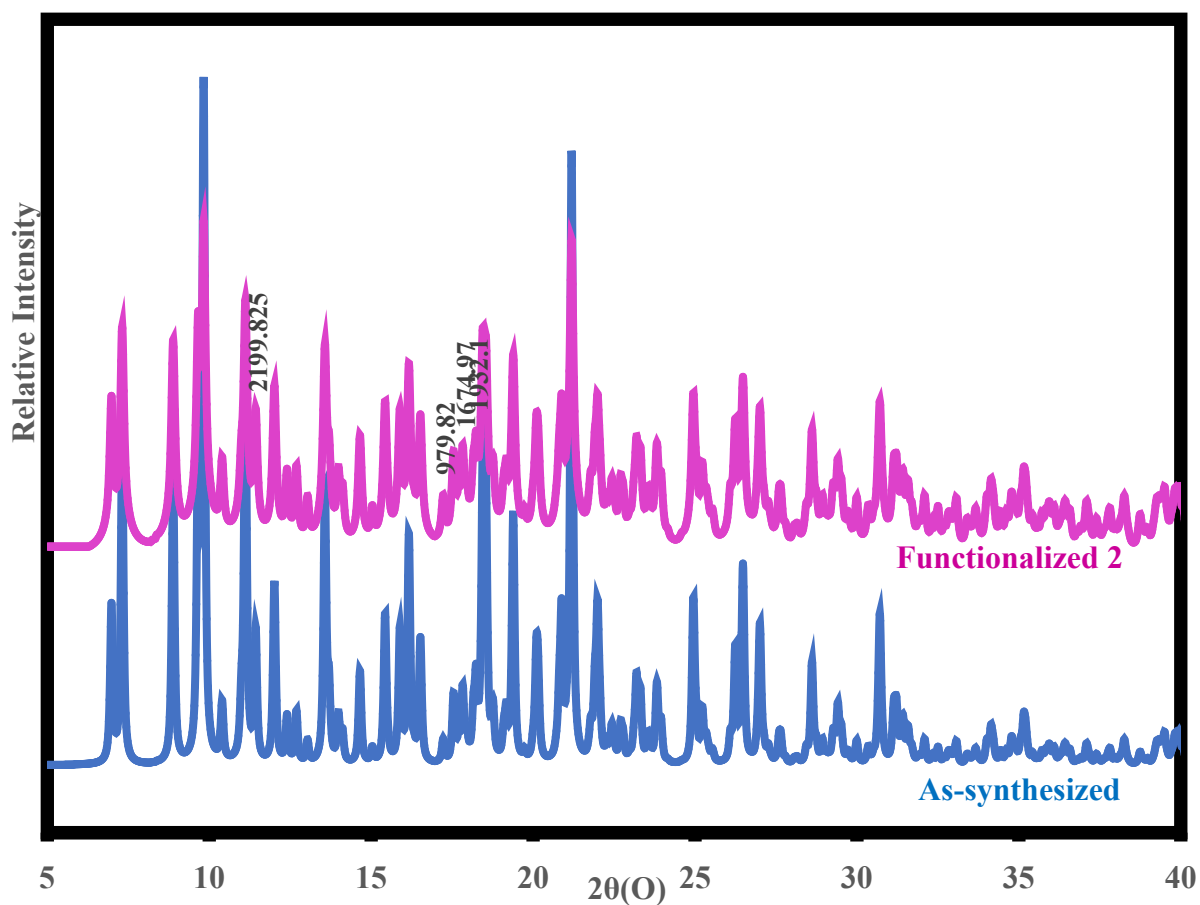

Figure S5: Comparison of the PXRD spectra of as-synthesized 1 and functionalized MOFs 2

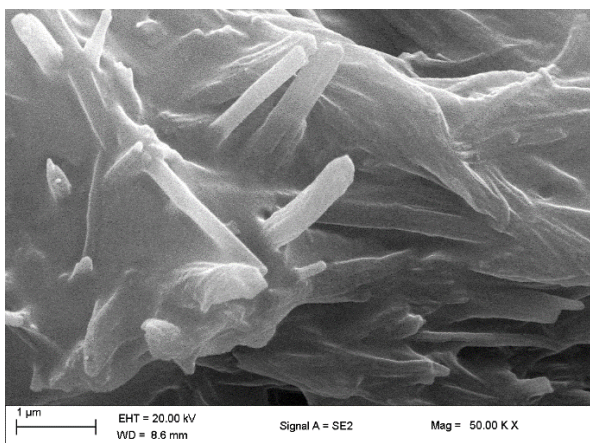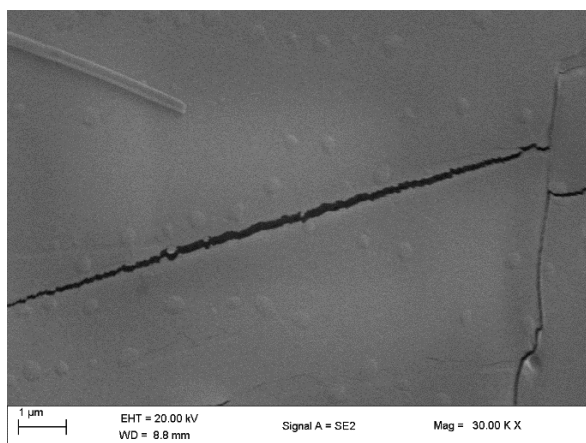

Figure S6: SEM images of **1** at different magnification

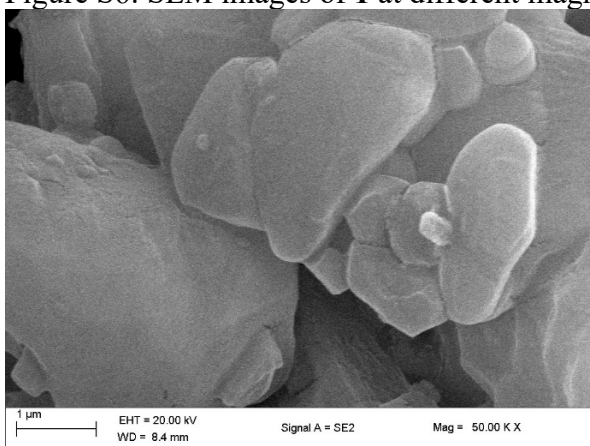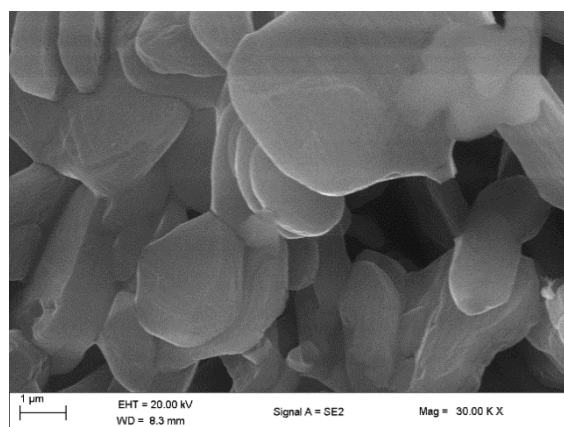

Figure S7: SEM images of **2** at different magnification

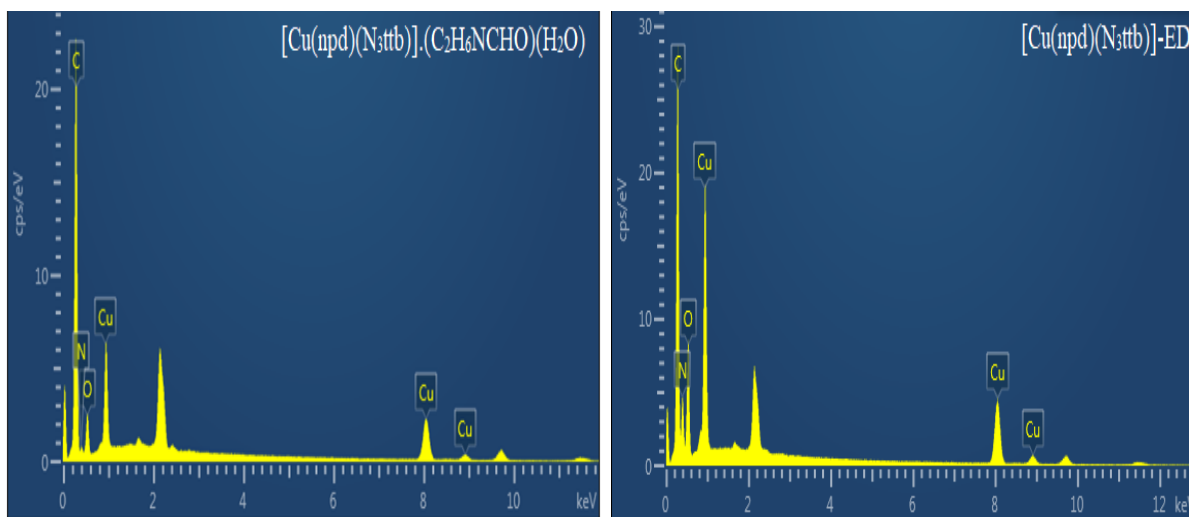

Figure S8: EDX Spectra of **1** and **2**

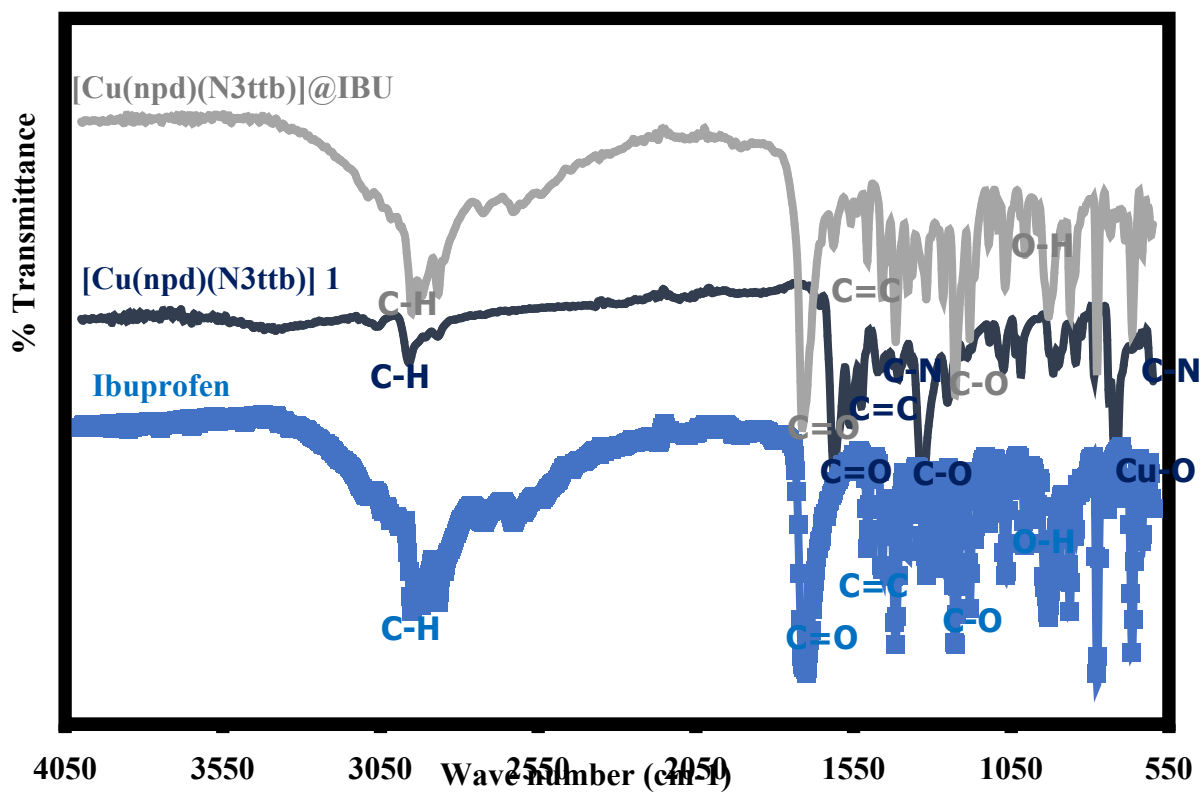

Figure S9: Infrared spectra of **1** before and after loading of Ibuprofen.

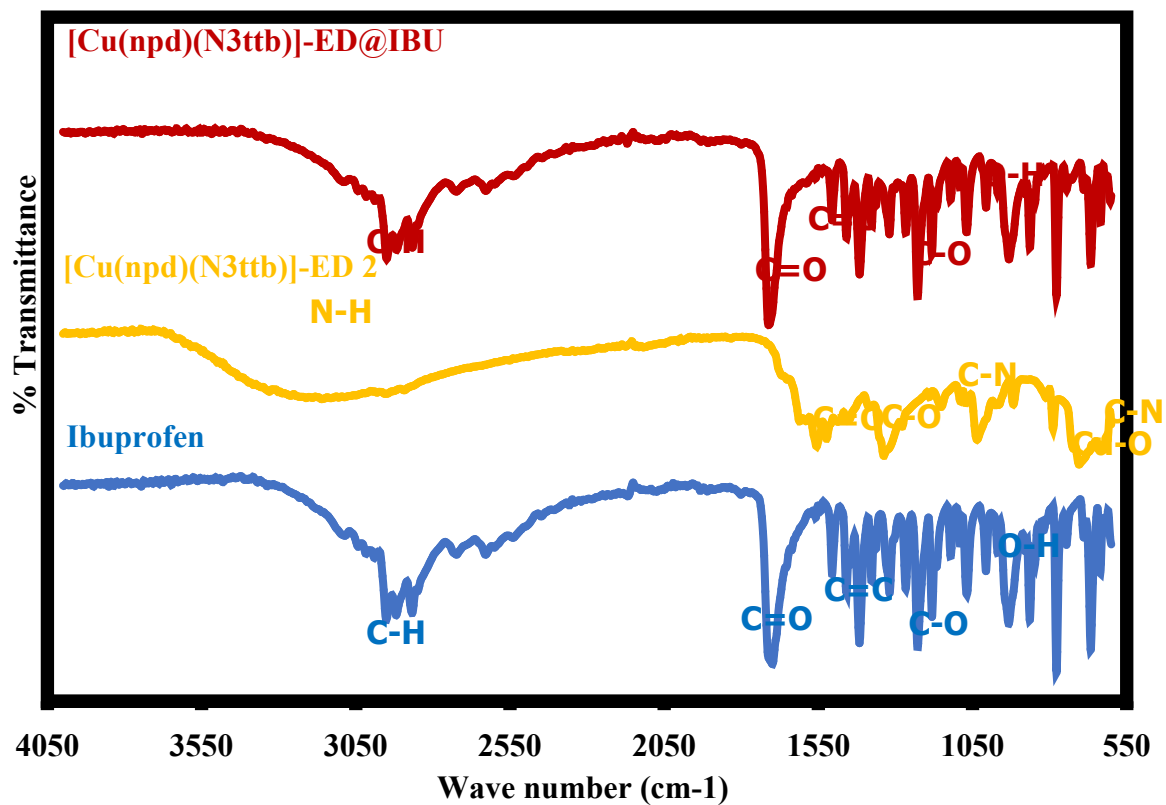

Figure S10: Infrared spectra of **2** before and after loading of Ibuprofen.

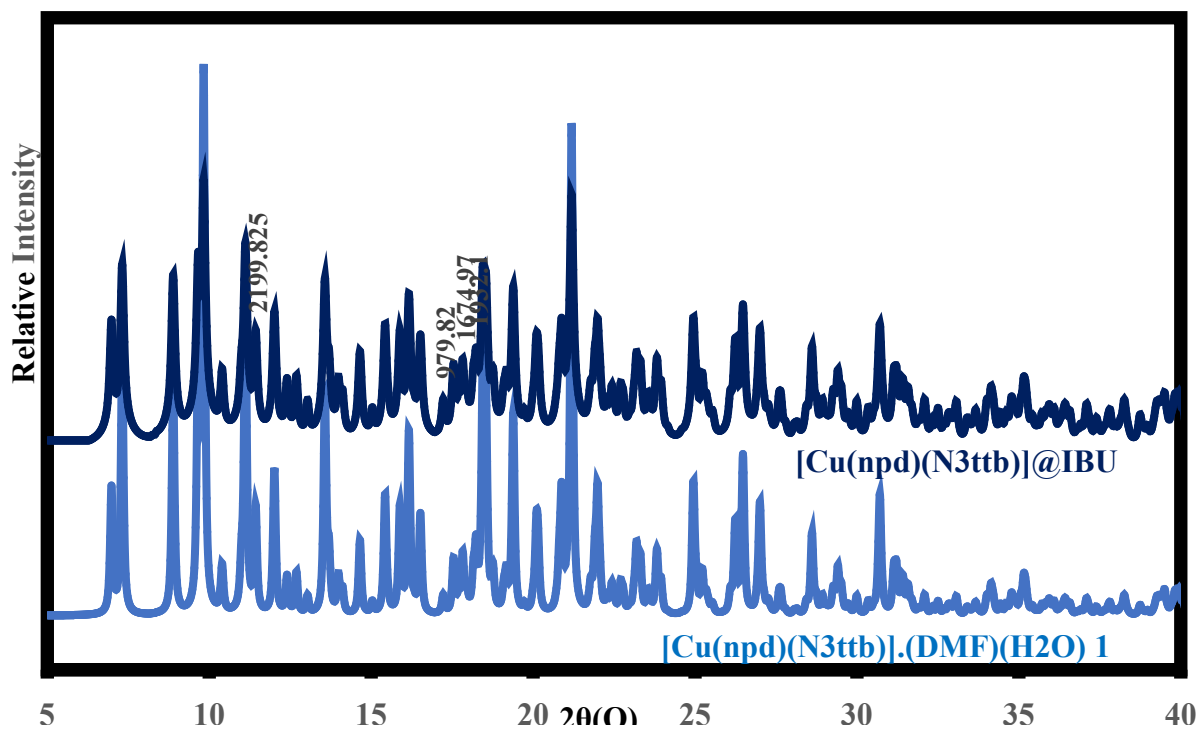

Figure S11: PXRD spectra of **1** before and after loading of Ibuprofen.

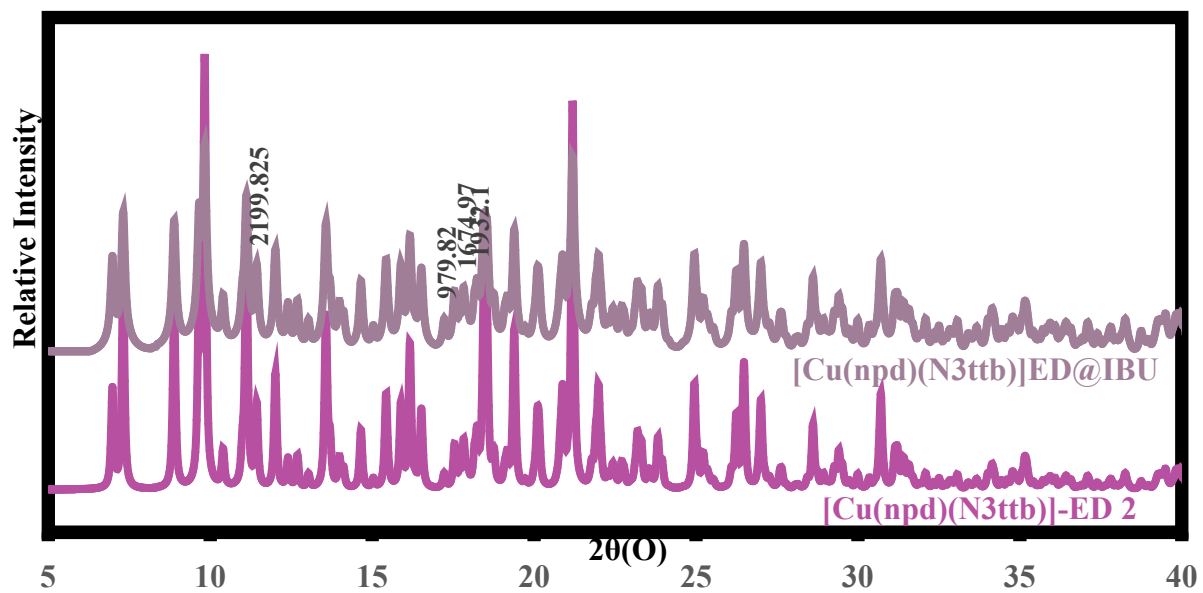

Figure S12: PXRD spectra of **2** before and after loading of Ibuprofen.

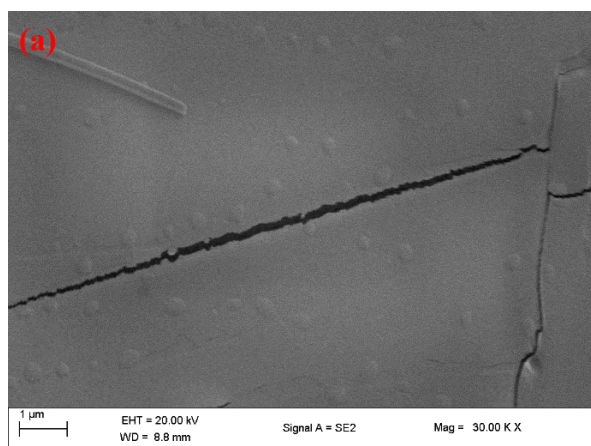

(b)

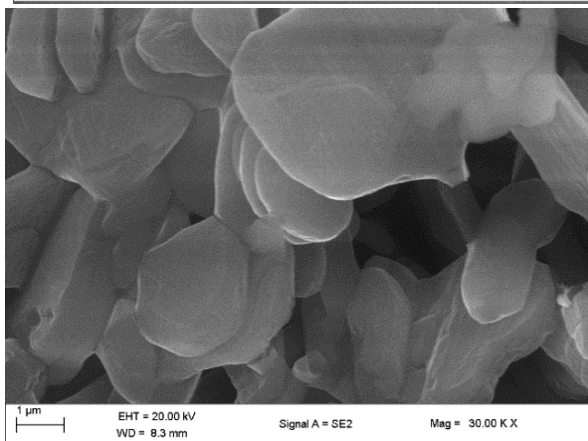

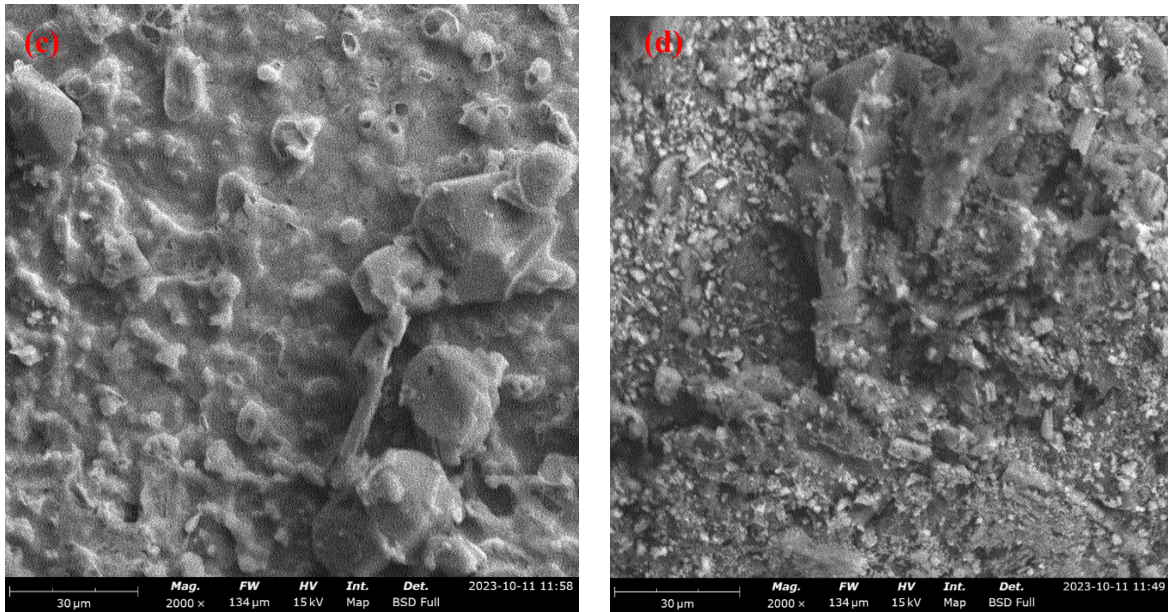

Figure S13: SEM Image of (a)  $[\text{Cu}(\text{npd})(\text{N}_3\text{ttb})].(\text{C}_2\text{H}_6\text{NCHO})(\text{H}_2\text{O})$  (b)  $[\text{Cu}(\text{npd})(\text{N}_3\text{ttb})]\text{-ED}$  (c)  $[\text{Cu}(\text{npd})(\text{N}_3\text{ttb})]\text{@IBU}$  (d)  $[\text{Cu}(\text{npd})(\text{N}_3\text{ttb})]\text{-ED@IBU}$

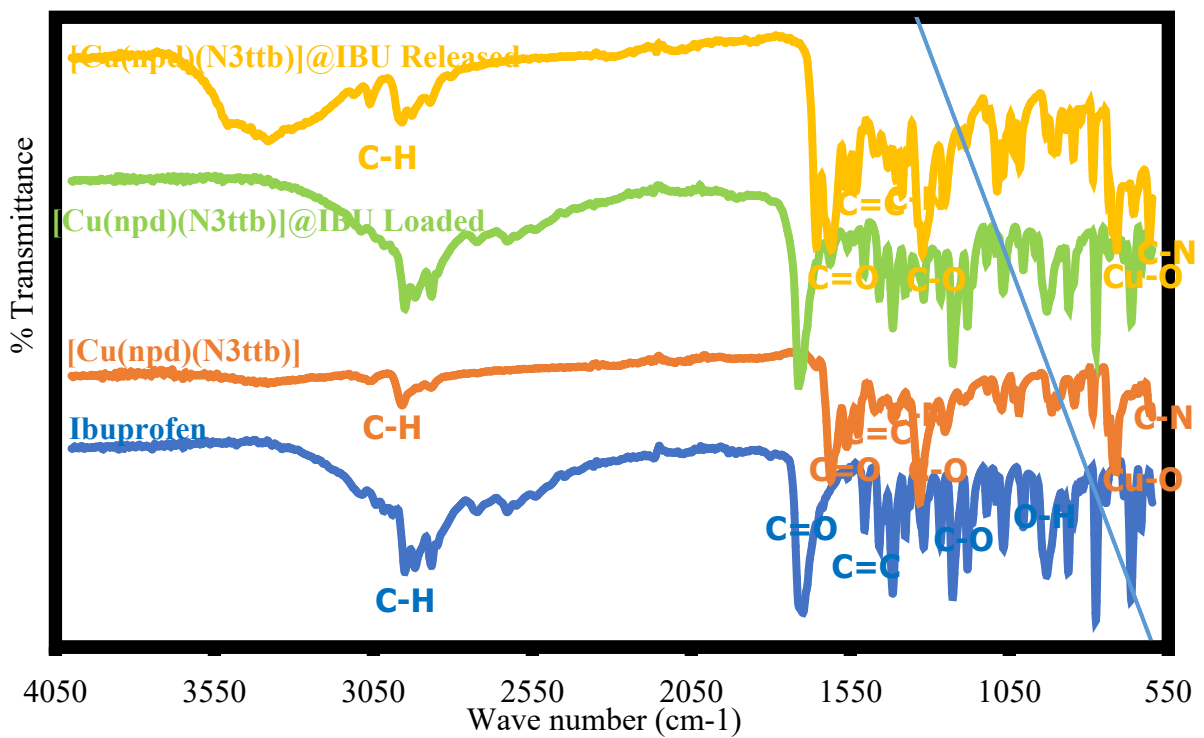

Figure S14: Infrared spectra of  $[\text{Cu}(\text{npd})(\text{N}_3\text{ttb})]\text{@IBU}$  (Loading and released)



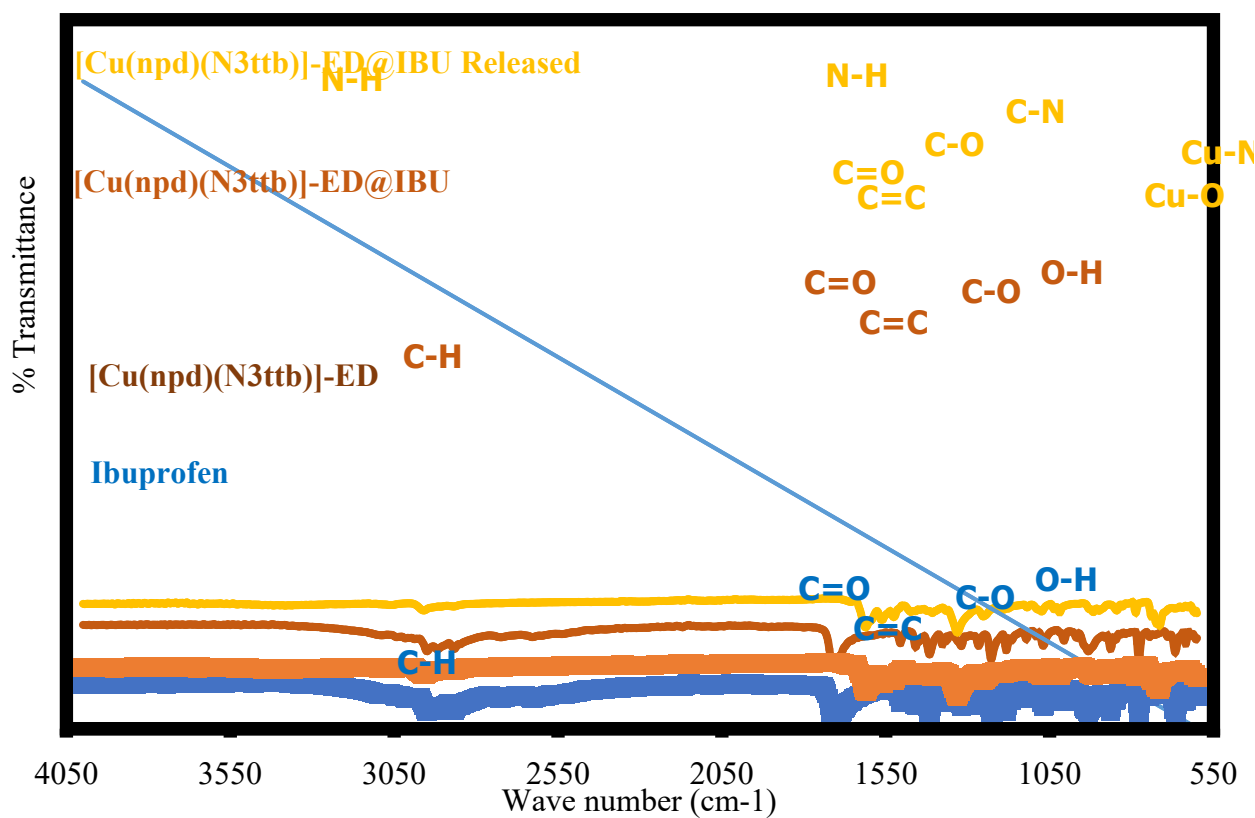

Figure S15: Infrared spectra of [Cu(npd)(N<sub>3</sub>ttb)]-ED@IBU (Loading and released).

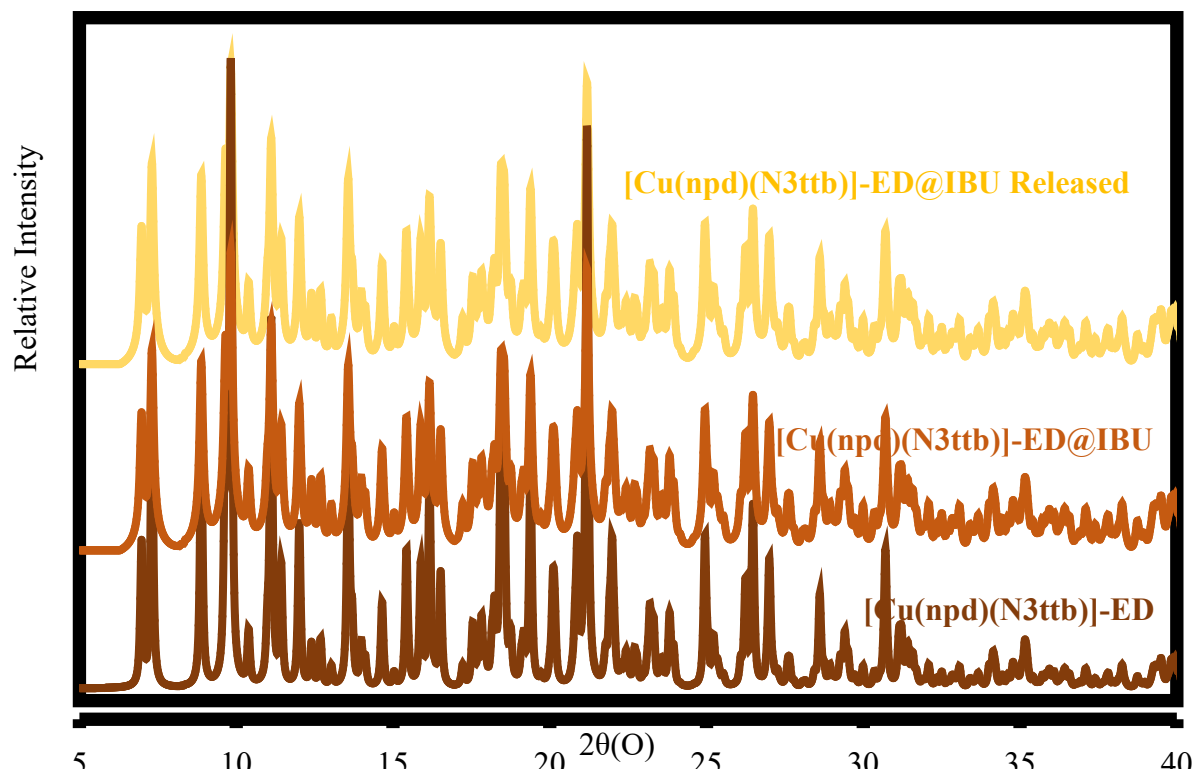

Figure S16: Comparison of the PXRD spectra of [Cu(npd)(N<sub>3</sub>ttb)]-ED@IBU (Loaded and released) MOFs.

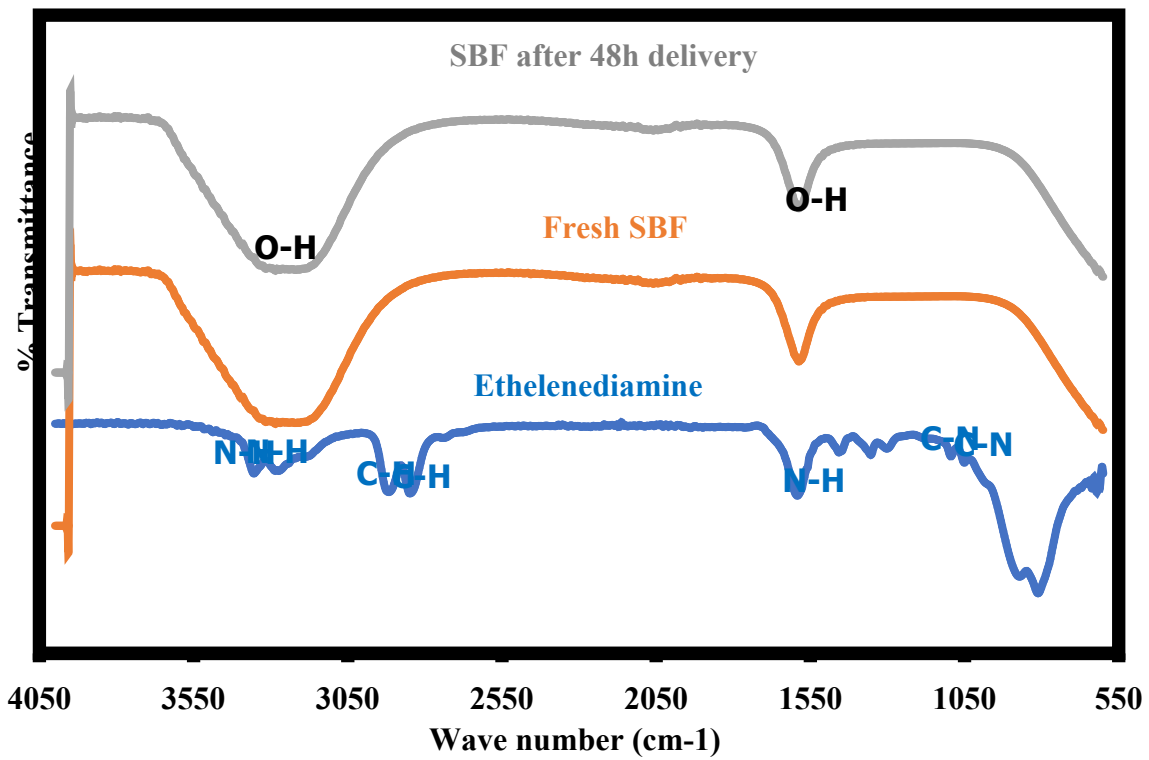

Figure S17: Comparison of the FT-IR spectra of Ethylenediamine and Simulated body fluid.

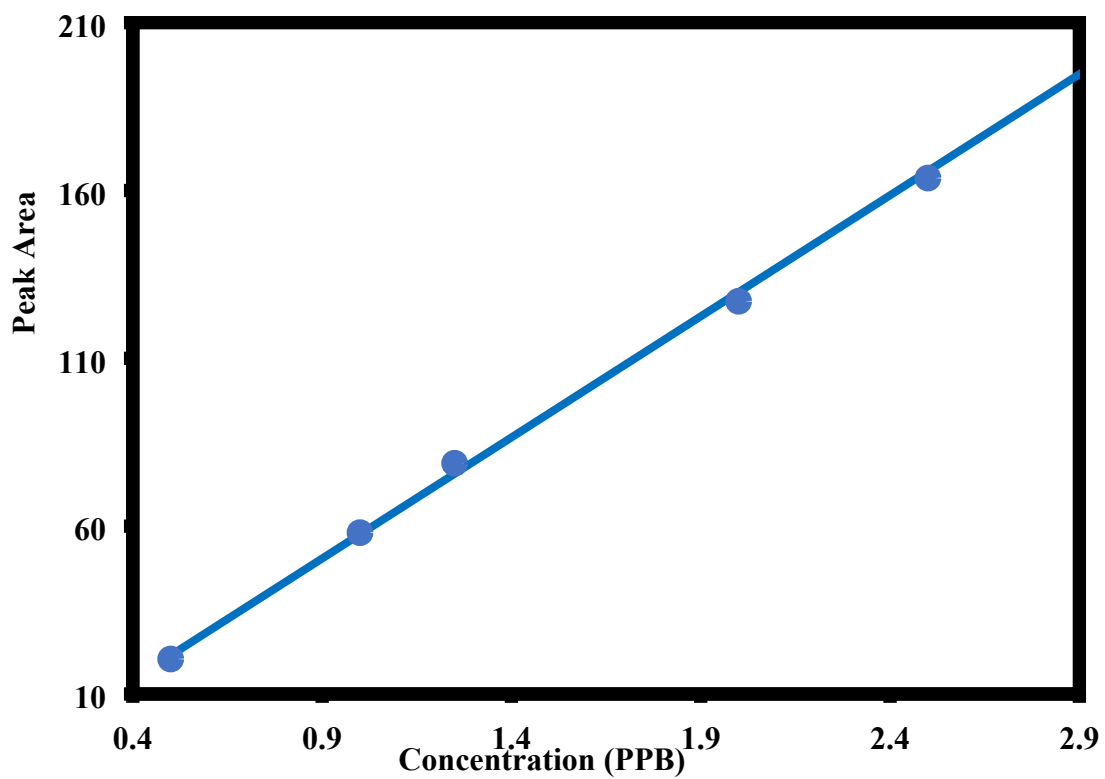

Figure S18: Calibration plot of standard ethylenediamine by HPLC method.

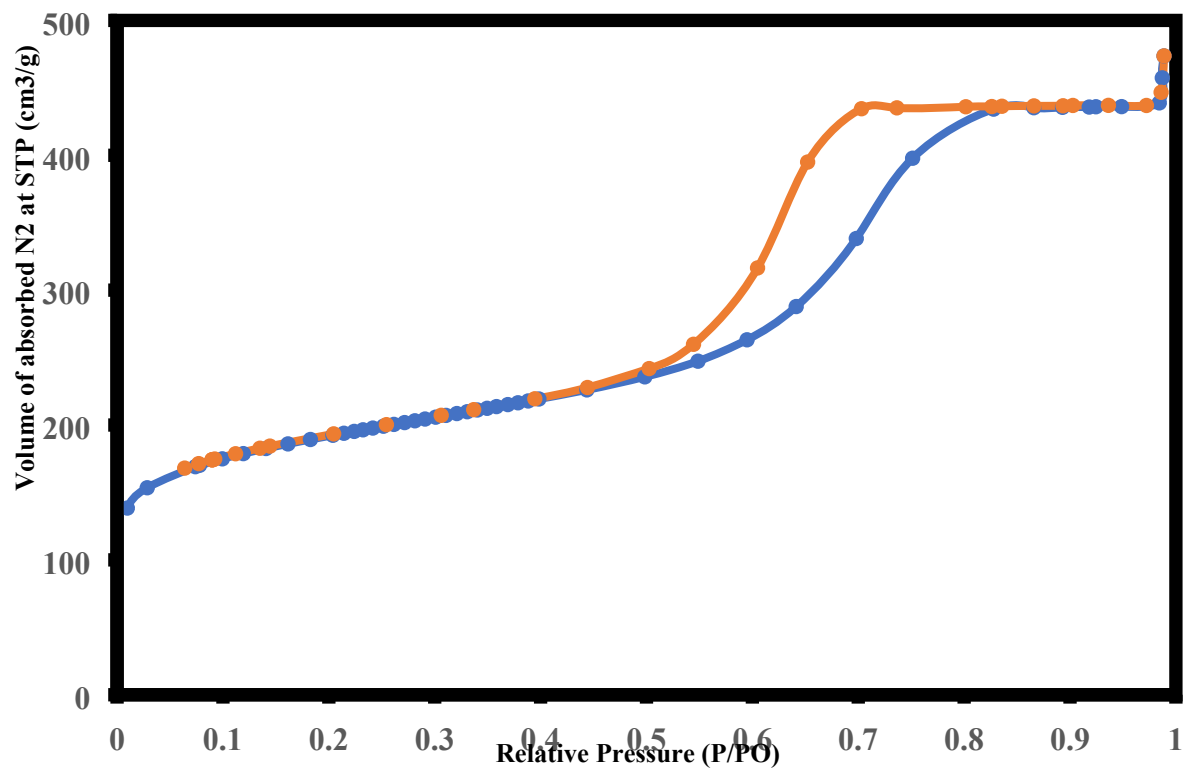

Figure S19: Nitrogen adsorption-desorption isotherm plot for 1

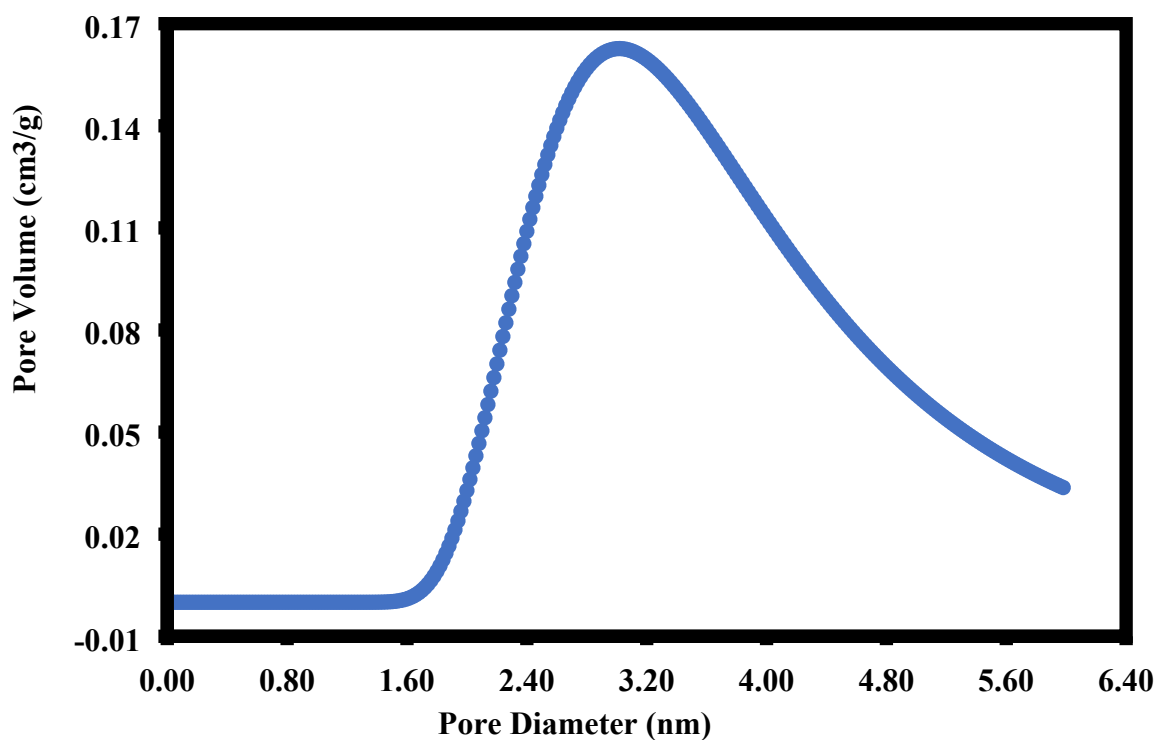

Figure S20: Pore size distribution for 1

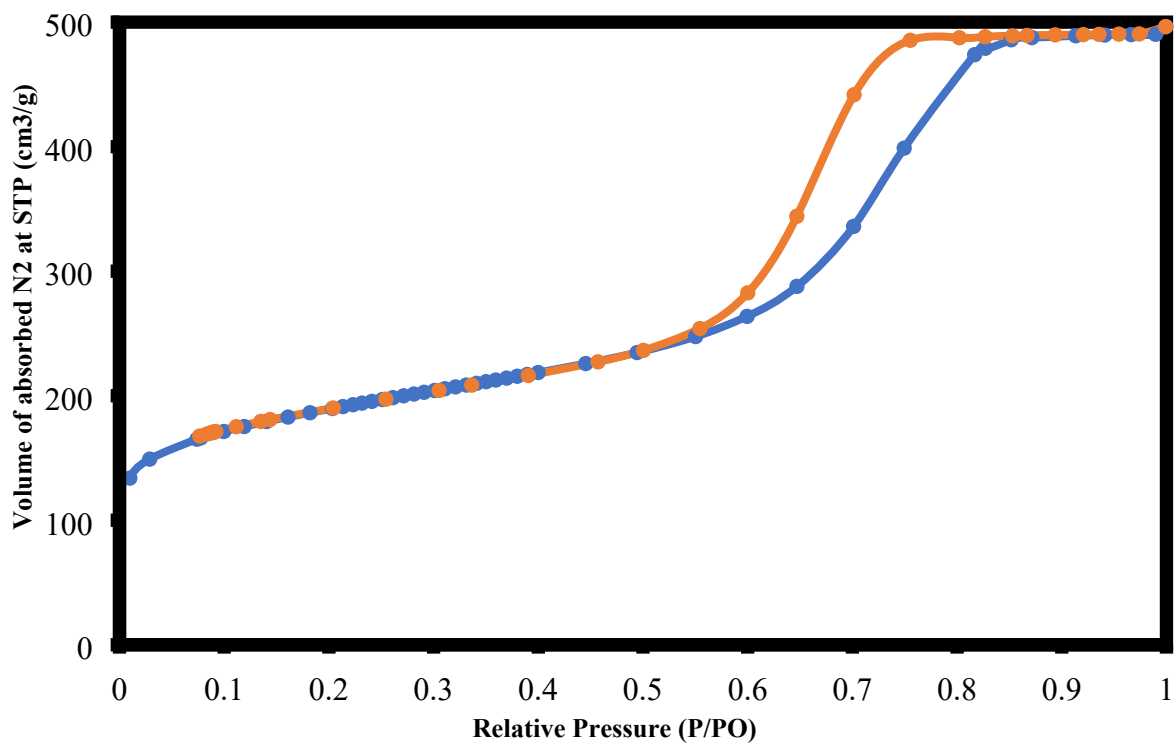

Figure S21: Nitrogen adsorption-desorption isotherm plot for **2**

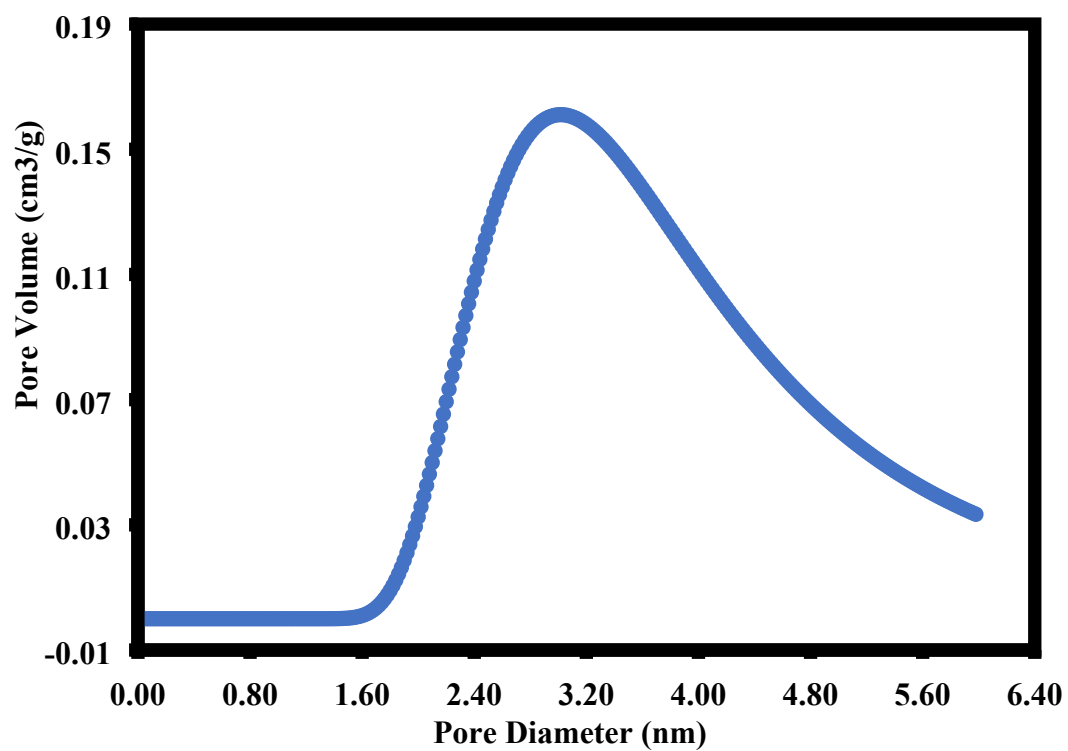

Figure S22: Pore size distribution for **2**

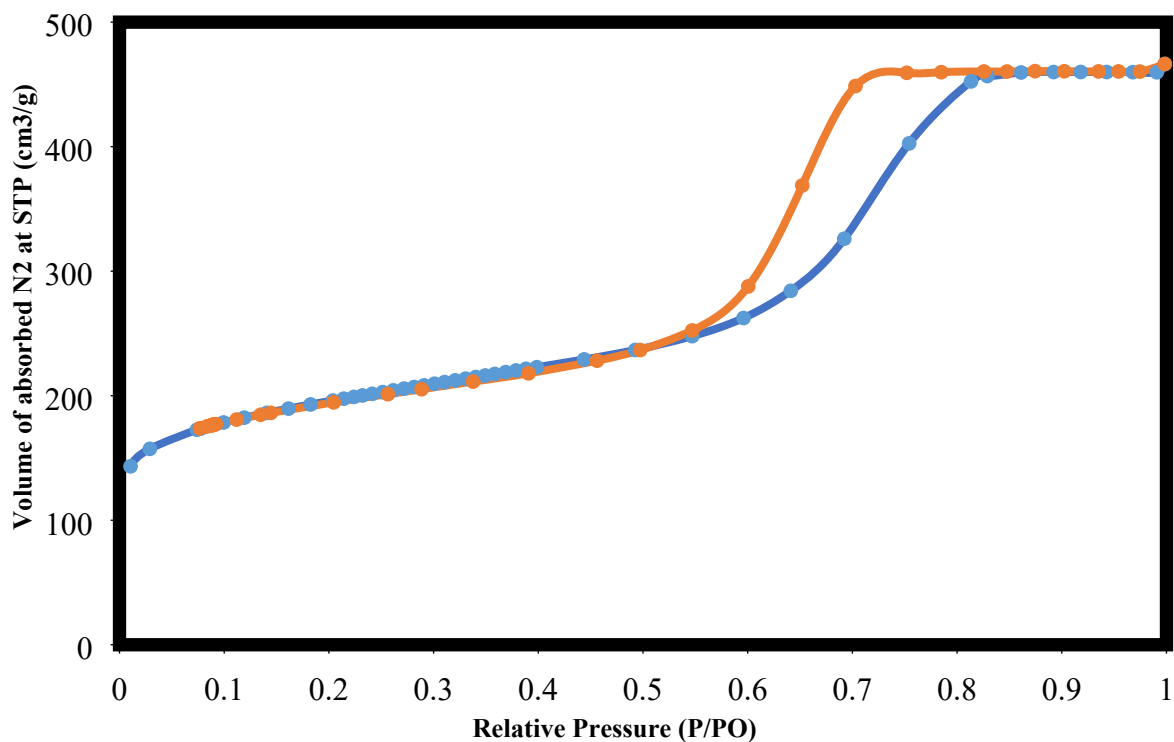

Figure S23: Nitrogen adsorption-desorption isotherm plot for [Cu(npd)(N<sub>3</sub>ttb)]@IBU

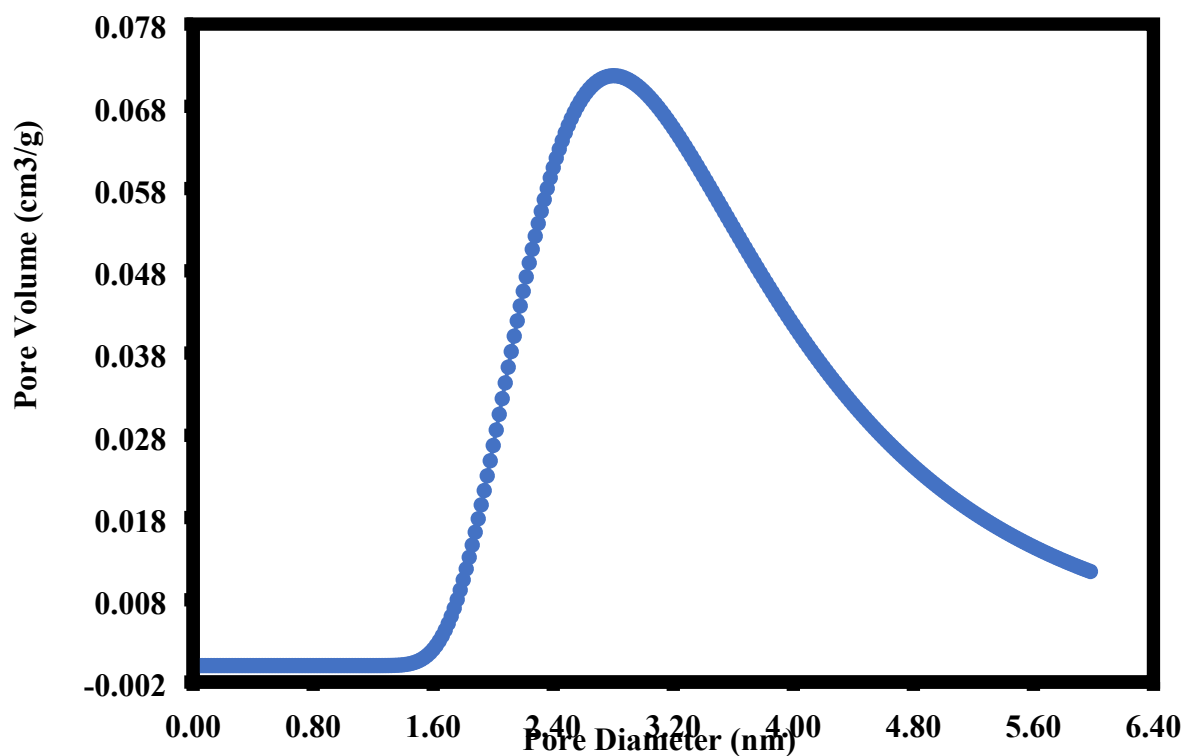

Figure S24: Pore size distribution for [Cu(npd)(N<sub>3</sub>ttb)]@IBU

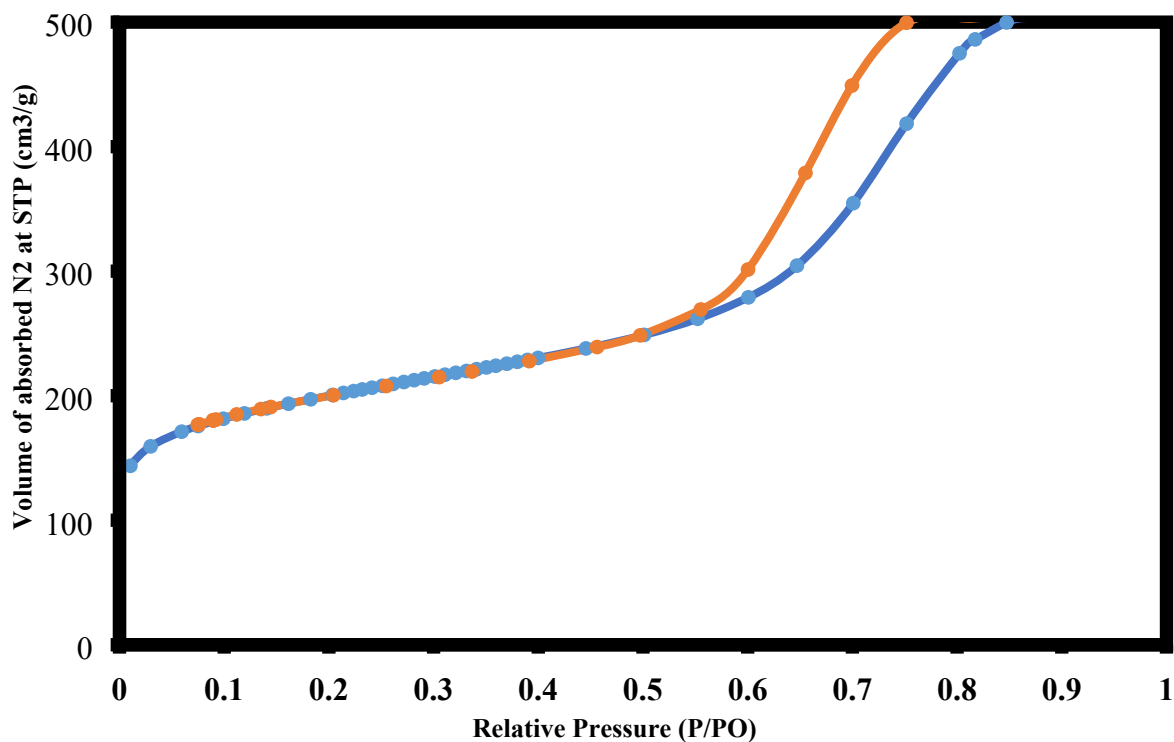

Figure S25: Nitrogen adsorption-desorption isotherm plot for [Cu(npd)(N<sub>3</sub>ttb)]-ED@IBU

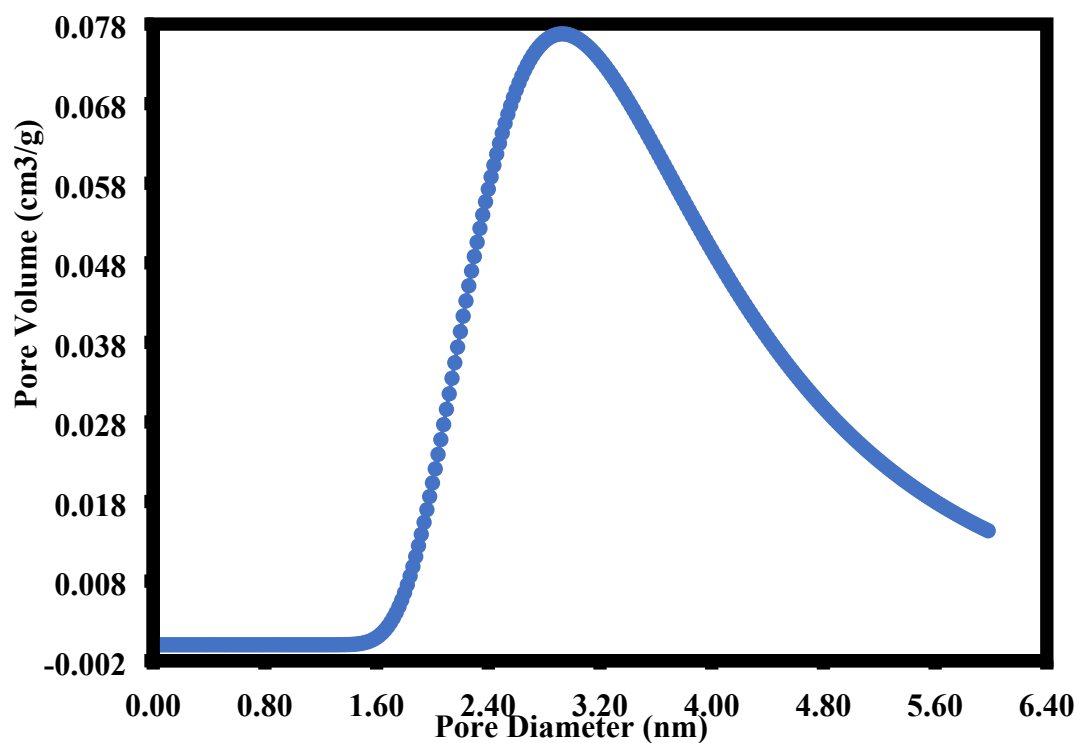

Figure S26: Pore size distribution for [Cu(npd)(N<sub>3</sub>ttb)]-ED@IBU

Table T1: Elemental composition of **1** and **2**.

| ELEMENT  | [Cu(npd)(N <sub>3</sub> ttb)].(C <sub>2</sub> H <sub>6</sub> NCHO)(H <sub>2</sub> O) |           | [Cu(npd)(N <sub>3</sub> ttb)]-ED |           |
|----------|--------------------------------------------------------------------------------------|-----------|----------------------------------|-----------|
|          | Wt%                                                                                  | Wt% Sigma | Wt%                              | Wt% Sigma |
| Carbon   | 66.17                                                                                | 0.60      | 44.28                            | 0.35      |
| Nitrogen | 10.14                                                                                | 0.75      | 24.45                            | 0.48      |
| Oxygen   | 11.51                                                                                | 0.25      | 19.68                            | 0.25      |
| Copper   | 12.18                                                                                | 0.17      | 11.56                            | 0.13      |
| Total    | 100                                                                                  |           | 100                              |           |

Table T2: Comparison of the loading of Ibuprofen in different MOFs. <sup>59–67</sup>

| <b>S/No</b> | <b>MOFs</b>                                            | <b>Loading Capacity<br/>(mg/g)</b> | <b>Author</b>        |
|-------------|--------------------------------------------------------|------------------------------------|----------------------|
| 1           | 2                                                      | 1,530.2                            | <b>This Research</b> |
| 2           | 1                                                      | 916.4                              | <b>This Research</b> |
| 3           | [Zn(BDC)(H <sub>2</sub> O) <sub>2</sub> ] <sub>n</sub> | 445.0                              | 62                   |
| 4           | MIL-100                                                | 347.0                              | 59                   |
| 5           | MIL-100(Fe)                                            | 330.0                              | 63                   |
| 6           | MIL-100                                                | 330.0                              | 60                   |
| 7           | MIL-53                                                 | 220.0                              | 60                   |
| 8           | MIL-53(Cr)                                             | 220.0                              | 64                   |
| 9           | MIL-53(Fe)                                             | 210.0                              | 64                   |
| 10          | MIL-53                                                 | 190                                | 65                   |
| 11          | MIL-47                                                 | 120                                | 65                   |
| 12          | MOF-2                                                  | 70.0                               | 66                   |
| 13          | MOF-3                                                  | 50.0                               | 66                   |
| 14          | MOF-1                                                  | 25.0                               | 66                   |
| 15          | MOF-4                                                  | 10.0                               | 66                   |



Table T3: Conc. of Cu<sup>2+</sup> (ppb)

| <b>Time (h)</b> | <b>Concentration (ppb)</b> |
|-----------------|----------------------------|
| 0               | 0.00                       |
| 3               | 0.02                       |
| 6               | 0.00                       |
| 12              | 0.05                       |
| 24              | 0.01                       |
| 48              | 0.01                       |

Table T4: Conc. of Ethylenediamine (ppb)

| <b>Time (h)</b> | <b>Concentration (ppb)</b> |
|-----------------|----------------------------|
| 0               | 0.00                       |
| 3               | 0.00                       |
| 6               | 0.00                       |
| 12              | 0.00                       |
| 24              | 0.00                       |
| 48              | 0.00                       |

Table T5: BET surface area & pore volume comparison of **1** and **2** before & after drug Loading.

| <b>MOFs</b>                                                                          | <b>Surface Area<br/>(m<sup>2</sup>/g)</b> | <b>Pore Volume<br/>(cc/g)</b> | <b>Volume Filled<br/>(%)</b> |
|--------------------------------------------------------------------------------------|-------------------------------------------|-------------------------------|------------------------------|
| [Cu(npd)(N <sub>3</sub> ttb)].(C <sub>2</sub> H <sub>6</sub> NCHO)(H <sub>2</sub> O) | 527.645                                   | 0.466                         | 0.00                         |
| [Cu(npd)(N <sub>3</sub> ttb)]@IBU                                                    | 211.494                                   | 0.191                         | 59.01                        |
| [Cu(npd)(N <sub>3</sub> ttb)]-ED                                                     | 497.591                                   | 0.425                         | 0.00                         |
| [Cu(npd)(N <sub>3</sub> ttb)]-ED@IBU                                                 | 235.505                                   | 0.213                         | 49.88                        |
